# Supplementary material for: Modulating the electronic properties of germanium nanowires via applied strain and surface passivation
Source: Royal Society of Chemistry journal article supplement (doi:10.1039/c3cp43530j), 2013-01-01
Supplement: c3cp43530j.pdf [file c3cp43530j.pdf]

*Electronic supplementary information to*

**Modulating the Electronic Properties of Germanium Nanowires  
via Applied Strain and Chemical Surface Passivation †**

**Mahasin Alam Sk,<sup>a</sup> Man-Fai Ng,<sup>b,\*</sup> Lin Huang,<sup>a</sup> and Kok Hwa Lim<sup>a,\*</sup>**

*<sup>a</sup> Division of Chemical and Biomolecular Engineering, School of Chemical and Biomedical Engineering, Nanyang Technological University, Singapore 639798, Singapore*

*<sup>b</sup> Institute of High Performance Computing, Agency for Science, Technology and Research, 1 Fusionopolis Way, #16-16 Connexis, Singapore 138632, Singapore*

**Table S1.** Band gap of mono-substituted  $\langle 110 \rangle$  F-GeNW with six different positions

| $\langle 110 \rangle$ F-GeNW <b>1</b> | $E_{\text{gap}}$ (eV) |
|---------------------------------------|-----------------------|
| P1 <sup>a</sup>                       | 1.39                  |
| P2 <sup>a</sup>                       | 1.61                  |
| P3 <sup>a</sup>                       | 1.39                  |
| P4 <sup>a</sup>                       | 1.39                  |
| P5 <sup>a</sup>                       | 1.40                  |
| P6 <sup>a</sup>                       | 1.56                  |

<sup>a</sup> See Figure S1 for definition.

**Table S2.** Calculated band ( $E_{\text{gap}}$ ) of 50.0% F- and Cl-GeNW **1** and **2** with applied strains

| Applied    | $E_{\text{gap}}$ (eV)                      |                                            |
|------------|--------------------------------------------|--------------------------------------------|
| strain (%) | $\langle 100 \rangle$ 50% F-GeNW <b>1</b>  | $\langle 110 \rangle$ 50% F-GeNW <b>1</b>  |
| -10.0      | 2.29 <i>d</i>                              | 0.51 <i>d</i>                              |
| 0.0        | 2.23 <i>d</i>                              | 0.83 <i>d</i>                              |
| 10.0       | 2.08 <i>d</i>                              | 0.42 <i>d</i>                              |
|            | $\langle 100 \rangle$ 50% Cl-GeNW <b>1</b> | $\langle 110 \rangle$ 50% Cl-GeNW <b>1</b> |
| -10.0      | 1.75 <i>d</i>                              | 0.58 <i>i</i>                              |
| 0.0        | 1.75 <i>d</i>                              | 0.82 <i>d</i>                              |
| 10.0       | 1.39 <i>i</i>                              | 0.41 <i>d</i>                              |
|            | $\langle 100 \rangle$ 50% F-GeNW <b>2</b>  | $\langle 110 \rangle$ 50% F-GeNW <b>2</b>  |
| -10.0      | 1.49 <i>d</i>                              | 0.25 <i>d</i>                              |
| 0.0        | 1.61 <i>d</i>                              | 0.60 <i>d</i>                              |
| 10.0       | 1.20 <i>d</i>                              | 0.18 <i>i</i>                              |
|            | $\langle 100 \rangle$ 50% Cl-GeNW <b>2</b> | $\langle 110 \rangle$ 50% Cl-GeNW <b>2</b> |
| -10.0      | 1.12 <i>d</i>                              | 0.18 <i>d</i>                              |
| 0.0        | 1.37 <i>d</i>                              | 0.56 <i>d</i>                              |
| 10.0       | 0.92 <i>d</i>                              | 0.17 <i>i</i>                              |

**Table S3.** The calculated formation energy ( $E_{\text{form}}$ ) of  $\langle 100 \rangle$  and  $\langle 110 \rangle$  F- and Cl-GeNW **2**.

| $\langle 100 \rangle$ GeNW |                                       | $\langle 110 \rangle$ GeNW |                                       |
|----------------------------|---------------------------------------|----------------------------|---------------------------------------|
| Surface coverage           | $E_{\text{form}}$ (eV per<br>Ge atom) | Surface coverage           | $E_{\text{form}}$ (eV per<br>Ge atom) |
| 100.0% H                   | 0.19                                  | 100.0% H                   | 0.16                                  |
| 25.0% F                    | -0.38                                 | 22.2% F                    | -0.09                                 |
| 50.0% F                    | -0.93                                 | 50.0% F                    | -0.67                                 |
| 75.0% F                    | -1.46                                 | 72.2% F                    | -1.06                                 |
| 100.0% F                   | -2.00                                 | 100.0% F                   | -1.39                                 |
| 25.0% Cl                   | -0.08                                 | 22.2% Cl                   | -0.02                                 |
| 50.0% Cl                   | -0.32                                 | 50.0% Cl                   | -0.24                                 |
| 75.0% Cl                   | -0.54                                 | 72.2% Cl                   | -0.40                                 |
| 100.0% Cl                  | -0.74                                 | 100.0% Cl                  | -0.52                                 |

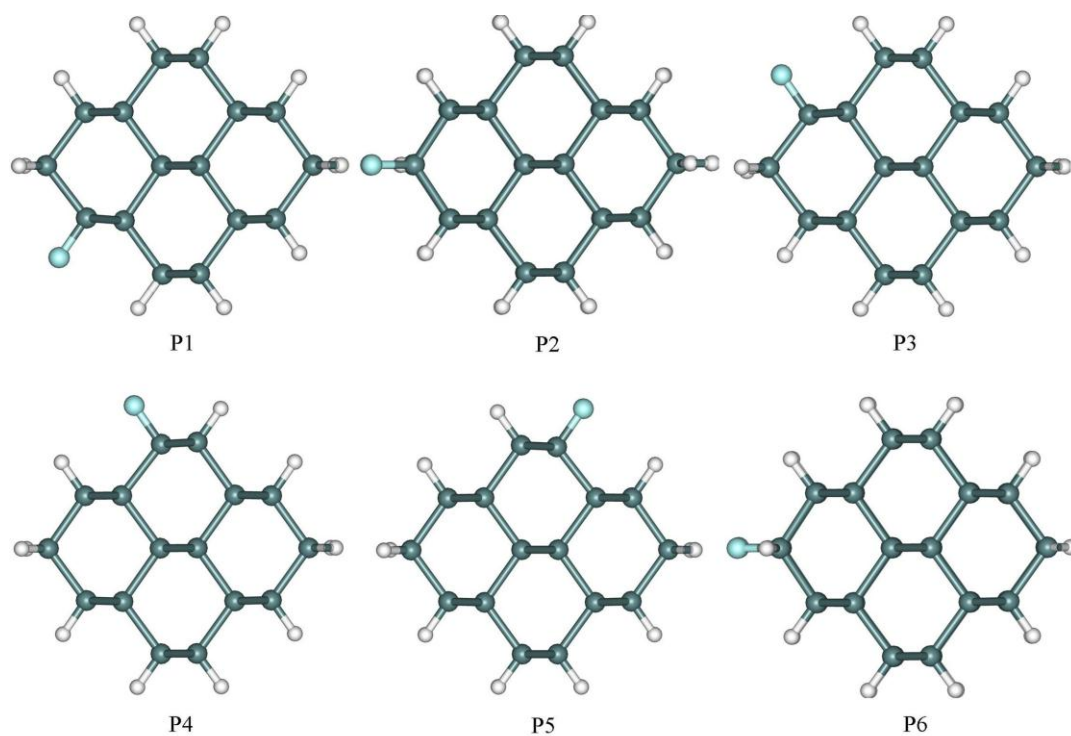

**Figure S1.** The optimized structures of mono-substituted  $\langle 110 \rangle$  F-GeNW **1** with six different positions. Dark green, light blue and white spheres are Ge, F and H atoms, respectively.

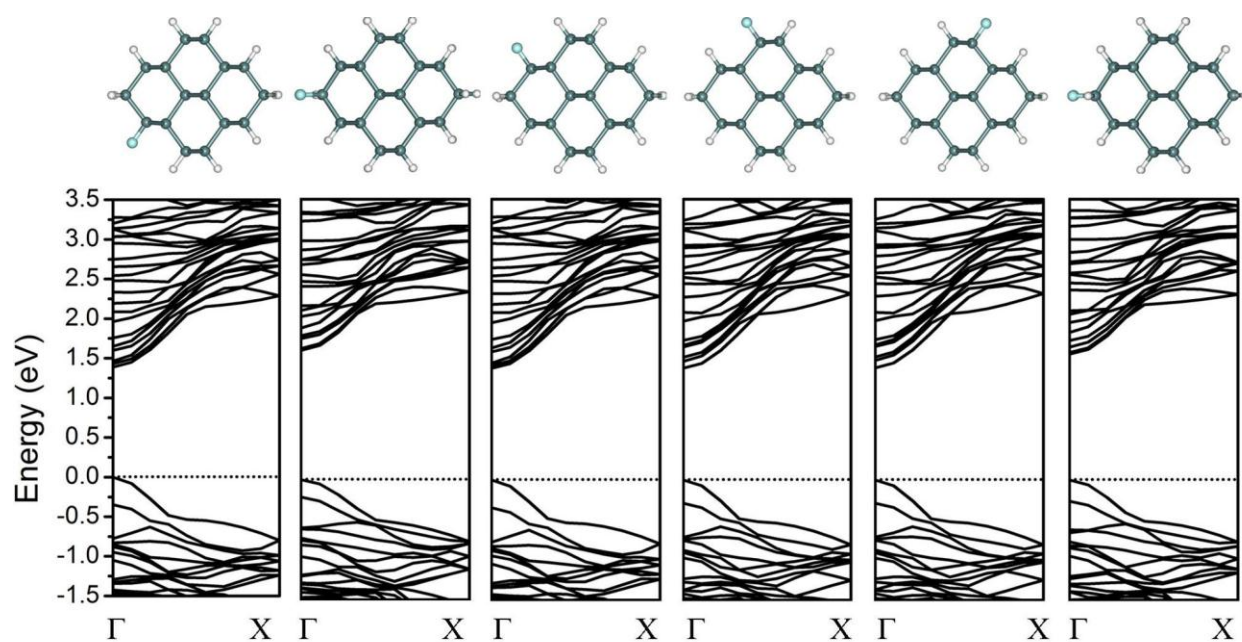

**Figure S2.** The band structures of mono-substituted  $\langle 110 \rangle$  F-GeNW **1** with six different positions. The energy zero is taken arbitrarily to be the VBM.

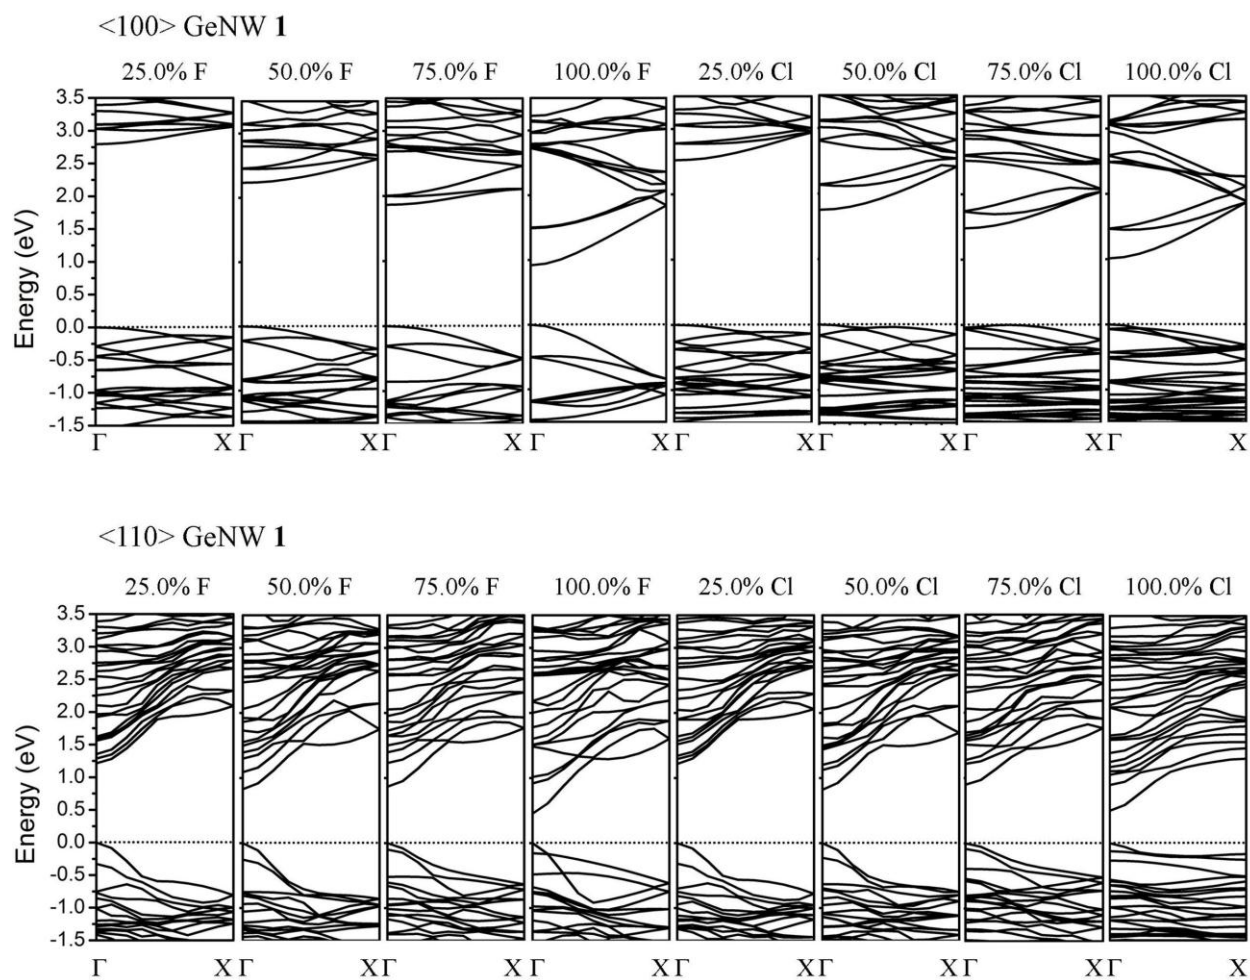

**Figure S3.** The band structures of  $\langle 100 \rangle$  and  $\langle 110 \rangle$  F- and Cl-GeNWs **1** with different surface coverage. The energy zero is taken arbitrarily to be the VBM.

**<100> GeNW 2**

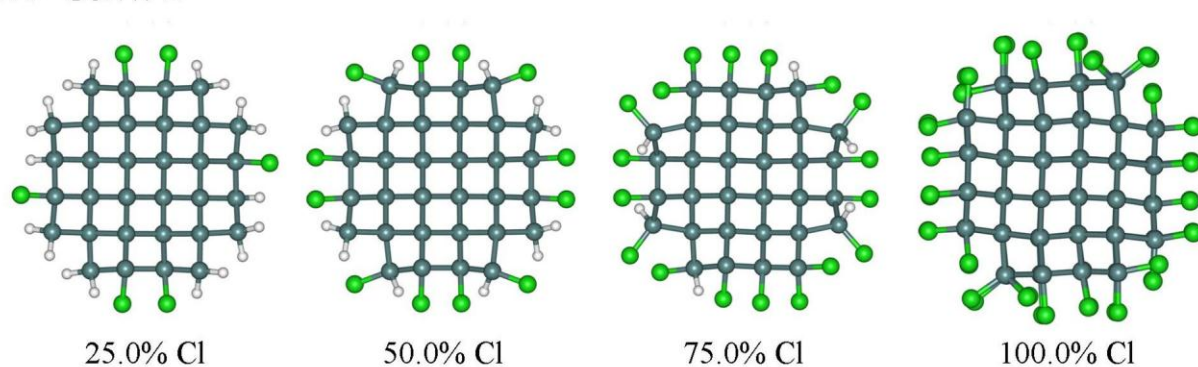

**<110> GeNW 2**

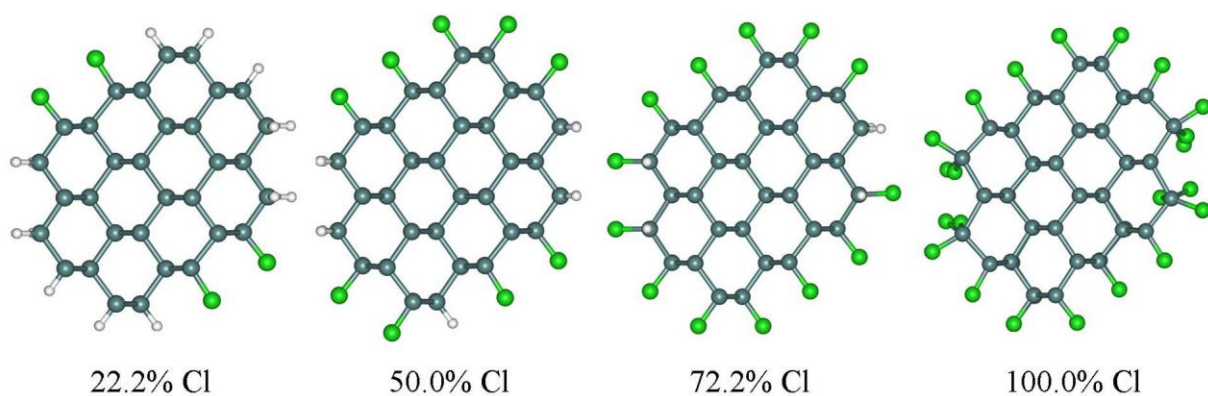

**Figure S4.** The optimized structures of  $\langle 100 \rangle$  and  $\langle 110 \rangle$  Cl-GeNWs **2** with different surface coverage of Cl. Dark green, green and white spheres are Ge, Cl and H atoms, respectively.
